# Supplementary material
Source: PubMed Central journal article supplement (PMC8320704)
Supplement: NIHMS1717707-supplement-Supple_figs_table_data.pdf [file NIHMS1717707-supplement-Supple_figs_table_data.pdf]

## SUPPORTING INFORMATION

Contents:

Page 2: Spectroscopic data of derivatives **12a,b,c** and **13a-aa**;

Page 8: Table 1: chemical, physical and analytical data of derivatives **12a-c** and **13a-aa**.

Page 9: Analyses of derivatives **10a-aa** and **11a-aa**.

Page 13: Molecular Modelling.

## 1. Spectroscopic data

**3-Acetyl-quinolin-4(1H)-one (12a).** Reference <sup>1</sup>. White solid; 56%; IR  $\nu$  3420 (NH), 1644 and 1589 (C=O)  $\text{cm}^{-1}$ ; <sup>1</sup>H NMR (DMSO-*d*<sub>6</sub>)  $\delta$  2.64 (s, 3H, CH<sub>3</sub>), 7.41-7.49 (m, 1H, quinolinone C6-H), 7.51-7.76 (m, 2H, quinolinone C7-H and C8-H), 8.22-8.26 (m, 1H, quinolinone C5-H), 8.54 (s, 1H, quinolinone C2-H), 12.54 (bs, 1H, NH).

**3-Acetyl-7-fluoroquinolin-4(1H)-one (12b).** White solid; 52%; IR  $\nu$  3050 (NH), 1650 (C=O), 1610 (C=O)  $\text{cm}^{-1}$ ; <sup>1</sup>H NMR (DMSO-*d*<sub>6</sub>)  $\delta$  2.65 (s, 3H, CH<sub>3</sub>), 7.48 (dd, 1H, quinolinone C6-H), 7.70 (d, 1H, quinolinone C8-H), 8.22 (d, 1H, quinolinone C5-H), 8.55 (s, 1H, quinolinone C2-H), 12.50 (br s, 1H NH).

**3-Acetyl-8-chloroquinolin-4(1H)-one (12c).** Reference <sup>1</sup>. White solid; 58%; IR  $\nu$  3183 (NH), 1637 and 1670 (C=O)  $\text{cm}^{-1}$ ; <sup>1</sup>H NMR (DMSO-*d*<sub>6</sub>)  $\delta$  2.59 (s, 3H, CH<sub>3</sub>), 7.42 (m, 1H, quinolinone C6-H), 7.89 (m, 1H, quinolinone C7-H), 8.17 (m, 1H, quinolinone C5-H), 8.37 (s, 1H, quinolinone C2-H), 12.08 (bs, 1H, NH).

**3-Acetyl-1-[(phenyl)methyl]quinolin-4(1H)-one (13a).** Beige solid; 56%; IR  $\nu$  1667 (C=O), 1620 (C=O)  $\text{cm}^{-1}$ ; <sup>1</sup>H NMR (DMSO-*d*<sub>6</sub>)  $\delta$  2.63 (s, 3H, CH<sub>3</sub>), 5.70 (s, 2H, CH<sub>2</sub>), 7.22-7.28 (m, 4H, benzene H), 7.33 (m, 1H, benzene H), 7.44 (m, 1H, quinolinone C6-H), 7.63-7.69 (m, 2H, quinolinone C7-H and C8-H), 8.30 (d, 1H, quinolinone C5-H), 8.85 (s, 1H, quinolinone C2-H).

**3-Acetyl-1-[(2-fluorophenyl)methyl]quinolin-4(1H)-one (13b).** White solid; 50%; IR  $\nu$  1663 (C=O), 1634 (C=O)  $\text{cm}^{-1}$ ; <sup>1</sup>H NMR (DMSO-*d*<sub>6</sub>)  $\delta$  2.63 (s, 3H, CH<sub>3</sub>), 5.74 (s, 2H, CH<sub>2</sub>), 7.11-7.16 (m, 2H, benzene H), 7.24 (m, 1H, benzene H), 7.35 (m, 1H, benzene H), 7.46 (m, 1H, quinolinone C6-H), 7.63-7.72 (m, 2H, quinolinone C7-H and C8-H), 8.30 (d, 1H, quinolinone C5-H), 8.84 (s, 1H, quinolinone C2-H).

**3-Acetyl-1-[(2-methoxyphenyl)methyl]quinolin-4(1H)-one (13c).** White solid; 60%; IR  $\nu$  1663 (C=O), 1631 (C=O)  $\text{cm}^{-1}$ ;  $^1\text{H}$  NMR (DMSO- $d_6$ )  $\delta$  2.62 (s, 3H, CH<sub>3</sub>), 3.81 (s, 3H, CH<sub>3</sub>), 5.55 (s, 2H, CH<sub>2</sub>), 6.87 (m, 1H, benzene H), 7.03-7.06 (m, 2H, benzene H), 7.29 (m, 1H, benzene H), 7.44 (m, 1H, quinolinone C6-H), 7.63-7.71 (m, 2H, quinolinone C7-H and C8-H), 8.29 (d, 1H, quinolinone C5-H), 8.77 (s, 1H, quinolinone C2-H).

**3-Acetyl-1-[(3-fluorophenyl)methyl]quinolin-4(1H)-one (13d).** White solid; 52%; IR  $\nu$  1663 (C=O), 1631 (C=O)  $\text{cm}^{-1}$ ;  $^1\text{H}$  NMR (DMSO- $d_6$ )  $\delta$  2.63 (s, 3H, CH<sub>3</sub>), 5.71 (s, 2H, CH<sub>2</sub>), 7.01 (d, 1H, benzene H), 7.08-7.14 (m, 2H, benzene H), 7.37 (m, 1H, benzene H), 7.44 (m, 1H, quinolinone C6-H), 7.61-7.70 (m, 2H, quinolinone C7-H and C8-H), 8.31 (d, 1H, quinolinone C5-H), 8.85 (s, 1H, quinolinone C2-H).

**3-acetyl-1-[(3-methoxyphenyl)methyl]quinolin-4(1H)-one (13e).** Yellow solid; 68%; IR  $\nu$  1669 (C=O), 1622 (C=O)  $\text{cm}^{-1}$ ;  $^1\text{H}$  NMR (DMSO- $d_6$ )  $\delta$  2.64 (s, 3H, CH<sub>3</sub>), 3.69 (s, 3H, CH<sub>3</sub>), 5.65 (s, 2H, CH<sub>2</sub>), 6.71 (d, 1H, benzene H), 6.83-6.85 (m, 2H, benzene H), 7.23 (m, 1H, benzene H), 7.44 (m, 1H, quinolinone C6-H), 7.64-7.70 (m, 2H, quinolinone C7-H and C8-H), 8.30 (d, 1H, quinolinone C5-H), 8.83 (s, 1H, quinolinone C2-H).

**3-Acetyl-1-[(4-chlorophenyl)methyl]quinolin-4(1H)-one (13f).** Yellow solid; 70%; IR  $\nu$  1660 (C=O), 1633 (C=O)  $\text{cm}^{-1}$ ;  $^1\text{H}$  NMR (DMSO- $d_6$ )  $\delta$  2.65 (s, 3H, CH<sub>3</sub>), 3.63 (s, 3H, CH<sub>3</sub>), 5.62 (s, 2H, CH<sub>2</sub>), 6.88-6.92 (d, 2H, benzene H), 7.21-7.27 (d, 2H, benzene H), 7.49 (t, 1H, quinolinone C6-H), 7.70-7.79 (m, 2H, quinolinone C7-H and C8-H), 8.35 (d, 1H, quinolinone C5-H), 8.84 (s, 1H, quinolinone C2-H).

**3-Acetyl-1-[(4-hydroxyphenyl)methyl]quinolin-4(1H)-one (13g).** Yellow solid; 65%; IR  $\nu$  3067 (OH), 1646 (C=O), 1613 (C=O)  $\text{cm}^{-1}$ ;  $^1\text{H}$  NMR (DMSO- $d_6$ )  $\delta$  2.62 (s, 3H, CH<sub>3</sub>), 3.68 (s, 3H, CH<sub>3</sub>), 5.60 (s, 2H, CH<sub>2</sub>), 6.87-6.90 (d, 2H, benzene H), 7.19-7.21 (d, 2H, benzene H), 7.44 (t, 1H, quinolinone

C6-H), 7.67-7.74 (m, 2H, quinolinone C7-H and C8-H), 8.28 (d, 1H, quinolinone C5-H), 8.79 (s, 1H, quinolinone C2-H), 9.5 (br s, 1H, OH).

**3-Acetyl-1-[(4-methoxyphenyl)methyl]quinolin-4(1H)-one (13h).** Yellow solid; 75%; IR  $\nu$  1667 (C=O), 1626 (C=O)  $\text{cm}^{-1}$ ;  $^1\text{H}$  NMR (DMSO- $d_6$ )  $\delta$  2.63 (s, 3H, CH<sub>3</sub>), 5.54 (s, 2H, CH<sub>2</sub>), 6.69-6.71 (d, 2H, benzene H), 7.08-7.10 (d, 2H, benzene H), 7.44 (t, 1H, quinolinone C6-H), 7.68-7.73 (m, 2H, quinolinone C7-H and C8-H), 8.29 (d, 1H, quinolinone C5-H), 8.83 (s, 1H, quinolinone C2-H).

**3-Acetyl-1-[(4-nitrophenyl)methyl]quinolin-4(1H)-one (13i).** Yellow solid; 55%; IR  $\nu$  1661 (C=O), 1631 (C=O)  $\text{cm}^{-1}$ ;  $^1\text{H}$  NMR (DMSO- $d_6$ )  $\delta$  2.65 (s, 3H, CH<sub>3</sub>), 5.87 (s, 2H, CH<sub>2</sub>), 7.44-7.48 (m, 3H, quinolinone C6-H and benzene H), 7.53-7.55 (d, 2H, benzene H), 7.64-7.69 (m, 2H, quinolinone C7-H and C8-H), 8.31 (d, 1H, quinolinone C5-H), 8.90 (s, 1H, quinolinone C2-H).

**3-Acetyl-1-[(2,4-difluorophenyl)methyl]quinolin-4(1H)-one (13j).** Yellow solid; 62%; IR  $\nu$  1660 (C=O), 1633 (C=O)  $\text{cm}^{-1}$ ;  $^1\text{H}$  NMR (DMSO- $d_6$ )  $\delta$  2.56 (s, 3H, CH<sub>3</sub>), 5.65 (s, 2H, CH<sub>2</sub>), 6.97 (t, 1H, benzene H), 7.15-7.25 (m, 2H, benzene H), 7.40 (t, 1H, quinolinone C6-H), 7.59 (d, 1H, quinolinone C8-H), 7.65 (t, 1H, quinolinone C7-H), 8.24 (d, 1H, quinolinone C5-H), 8.76 (s, 1H, quinolinone C2-H).

**3-Acetyl-1-[(2,5-difluorophenyl)methyl]quinolin-4(1H)-one (13k).** Yellow solid; 60%; IR  $\nu$  1663 (C=O), 1637 (C=O)  $\text{cm}^{-1}$ ;  $^1\text{H}$  NMR (DMSO- $d_6$ )  $\delta$  2.67 (s, 3H, CH<sub>3</sub>), 5.77 (s, 2H, CH<sub>2</sub>), 7.15 (m, 1H, benzene H), 7.26 (m, 1H, benzene H), 7.35 (m, 1H, benzene H), 7.50 (t, 1H, quinolinone C6-H), 7.67 (d, 1H, quinolinone C8-H), 7.76 (t, 1H, quinolinone C7-H), 8.35 (d, 1H, quinolinone C5-H), 8.87 (s, 1H, quinolinone C2-H).

**3-Acetyl-1-[(2,6-difluorophenyl)methyl]quinolin-4(1H)-one (13l).** White solid; 65%; IR  $\nu$  1662 (C=O), 1623 (C=O)  $\text{cm}^{-1}$ ;  $^1\text{H}$  NMR (DMSO- $d_6$ )  $\delta$  2.62 (s, 3H, CH<sub>3</sub>), 5.77 (s, 2H, CH<sub>2</sub>), 7.13-7.17 (m, 2H, benzene H), 7.42-7.49 (m, 2H, quinolinone C6-H and benzene H), 7.63 (d, 1H, quinolinone C8-H), 7.75 (t, 1H, quinolinone C7-H), 8.29 (dd, 1H, quinolinone C5-H), 8.84 (s, 1H, quinolinone C2-H).

**3-Acetyl-1-[(3,4-difluorophenyl)methyl]quinolin-4(1H)-one (13m).** Yellow solid; 54%; IR  $\nu$  1661 (C=O), 1634 (C=O)  $\text{cm}^{-1}$ ;  $^1\text{H}$  NMR (DMSO- $d_6$ )  $\delta$  2.67 (s, 3H, CH<sub>3</sub>), 5.71 (s, 2H, CH<sub>2</sub>), 7.09 (m, 1H, benzene H), 7.39-7.51 (m, 3H, quinolinone C6-H and benzene H), 7.67 (d, 1H, quinolinone C8-H), 7.73 (t, 1H, quinolinone C7-H), 8.34 (dd, 1H, quinolinone C5-H), 8.89 (s, 1H, quinolinone C2-H).

**3-Acetyl-1-[(3,5-difluorophenyl)methyl]quinolin-4(1H)-one (13n).** Yellow solid; 62%; IR  $\nu$  1656 (C=O), 1630 (C=O)  $\text{cm}^{-1}$ ;  $^1\text{H}$  NMR (DMSO- $d_6$ )  $\delta$  2.57 (s, 3H, CH<sub>3</sub>), 5.65 (s, 2H, CH<sub>2</sub>), 6.93 (m, 2H, benzene H), 7.10 (t, 1H, benzene H), 7.40 (t, 1H, quinolinone C6-H), 7.53 (d, 1H, quinolinone C8-H), 7.64 (t, 1H, quinolinone C7-H), 8.25 (d, 1H, quinolinone C5-H), 8.78 (s, 1H, quinolinone C2-H).

**3-Acetyl-1-[(2,4-dichlorophenyl)methyl]quinolin-4(1H)-one (13o).** Pink solid; 56%; IR  $\nu$  1664 (C=O), 1634 (C=O)  $\text{cm}^{-1}$ ;  $^1\text{H}$  NMR (DMSO- $d_6$ )  $\delta$  2.69 (s, 3H, CH<sub>3</sub>), 5.78 (s, 2H, CH<sub>2</sub>), 6.90 (d, 1H, benzene H), 7.38 (dd, 1H, benzene H), 7.47 (d, 1H, quinolinone C8-H), 7.54 (t, 1H, quinolinone C7-H), 7.76 (t, 1H, quinolinone C6-H), 7.82 (d, 1H, benzene H), 8.38 (dd, 1H, quinolinone C5-H), 8.87 (s, 1H, quinolinone C2-H).

**3-Acetyl-1-[(2,6-dichlorophenyl)methyl]quinolin-4(1H)-one (13p).** White solid; 54%; IR  $\nu$  1660 (C=O), 1625 (C=O)  $\text{cm}^{-1}$ ;  $^1\text{H}$  NMR (DMSO- $d_6$ )  $\delta$  2.63 (s, 3H, CH<sub>3</sub>), 5.82 (s, 2H, CH<sub>2</sub>), 7.58-7.63 (m, 2H, quinolinone C6-H and C7-H), 7.71-7.73 (d, 2H, benzene H), 7.89 (t, 1H, benzene H), 7.99 (d, 1H, quinolinone C8-H), 8.21 (s, 1H, quinolinone C2-H), 8.40 (d, 1H, quinolinone C5-H).

**3-Acetyl-1-[(2,4-dimethylphenyl)methyl]quinolin-4(1H)-one (13q).** White solid; 58%; IR  $\nu$  1661 (C=O), 1622 (C=O)  $\text{cm}^{-1}$ ;  $^1\text{H}$  NMR (DMSO- $d_6$ )  $\delta$  2.23 (s, 6H, CH<sub>3</sub>), 2.71 (s, 3H, CH<sub>3</sub>), 5.65 (s, 2H, CH<sub>2</sub>), 6.89 (s, 2H, benzene H), 6.93 (s, 1H, benzene H), 7.53 (d, 1H, quinolinone C8-H), 7.68-7.73 (m, 2H, quinolinone C6-H and C7-H), 8.35 (d, 1H, quinolinone C5-H), 8.86 (s, 1H, quinolinone C2-H).

**3-Acetyl-1-[(3,5-dimethylphenyl)methyl]quinolin-4(1H)-one (13r).** White solid; 68%; IR  $\nu$  1666 (C=O), 1625 (C=O)  $\text{cm}^{-1}$ ;  $^1\text{H}$  NMR (DMSO- $d_6$ )  $\delta$  2.24 (s, 6H, CH<sub>3</sub>), 2.70 (s, 3H, CH<sub>3</sub>), 5.66 (s, 2H,

CH<sub>2</sub>), 6.88 (s, 2H, benzene H), 6.95 (s, 1H, benzene H), 7.52 (d, 1H, quinolinone C8-H), 7.67-7.74 (m, 2H, quinolinone C6-H and C7-H), 8.36 (d, 1H, quinolinone C5-H), 8.88 (s, 1H, quinolinone C2-H).

**3-Acetyl-1-[(3-chloro-2-fluorophenyl)methyl]quinolin-4(1H)-one (13s).** White solid; 74%; IR  $\nu$  1667 (C=O), 1633 (C=O) cm<sup>-1</sup>; <sup>1</sup>H NMR (DMSO-*d*<sub>6</sub>)  $\delta$  2.57 (s, 3H, CH<sub>3</sub>), 5.74 (s, 2H, CH<sub>2</sub>), 7.15-7.40 (m, 3H, benzene H and quinolinone C6-H and C7-H), 7.50-7.63 (m, 3H, benzene H and quinolinone C8-H), 8.26 (d, 1H, quinolinone C5-H), 8.77 (s, 1H, quinolinone C2-H).

**3-Acetyl-1-[(3-chloro-4-fluorophenyl)methyl]quinolin-4(1H)-one (13t).** White solid; 55%; IR  $\nu$  1662 (C=O), 1631 (C=O) cm<sup>-1</sup>; <sup>1</sup>H NMR (DMSO-*d*<sub>6</sub>)  $\delta$  2.57 (s, 3H, CH<sub>3</sub>), 5.62 (s, 2H, CH<sub>2</sub>), 7.16-7.39 (m, 3H, benzene H and quinolinone C6-H and C7-H), 7.51-7.64 (m, 3H, benzene H and quinolinone C8-H), 8.25 (d, 1H, quinolinone C5-H), 8.79 (s, 1H, quinolinone C2-H).

**3-Acetyl-8-chloro-1-[(3-chloro-4-fluorophenyl)methyl]quinolin-4(1H)-one (13u).** White solid; 53%; IR  $\nu$  1660 (C=O), 1633 (C=O) cm<sup>-1</sup>; <sup>1</sup>H NMR (DMSO-*d*<sub>6</sub>)  $\delta$  2.56 (s, 3H, CH<sub>3</sub>), 5.96 (s, 2H, CH<sub>2</sub>), 6.97 (t, 1H, quinolinone C6-H), 7.27-7.40 (m, 3H, benzene H and C7-H), 7.75 (d, 1H, benzene H), 8.30 (d, 1H, quinolinone C5-H), 8.58 (s, 1H, quinolinone C2-H).

**3-Acetyl-8-chloro-1-[(2-fluorophenyl)methyl]quinolin-4(1H)-one (13v).** White solid; 52%; IR  $\nu$  1665 (C=O), 1618 (C=O) cm<sup>-1</sup>; <sup>1</sup>H NMR (DMSO-*d*<sub>6</sub>)  $\delta$  2.55 (s, 3H, CH<sub>3</sub>), 5.86 (s, 2H, CH<sub>2</sub>), 6.87-6.94 (m, 2H, benzene H and quinolinone C6-H), 7.23-7.35 (m, 3H, benzene H and quinolinone C7-H), 7.71 (d, 1H, benzene H), 8.29 (d, 1H, quinolinone C5-H), 8.56 (s, 1H, quinolinone C2-H).

**3-Acetyl-7-fluoro-1-[(2-fluorophenyl)methyl]quinolin-4(1H)-one (13w).** White solid; 62%; IR  $\nu$  1662 (C=O), 1631 (C=O) cm<sup>-1</sup>; <sup>1</sup>H NMR (DMSO-*d*<sub>6</sub>)  $\delta$  2.55 (s, 3H, CH<sub>3</sub>), 5.69 (s, 2H, CH<sub>2</sub>), 7.09-7.22 (m, 3H, benzene H and quinolinone C6-H), 7.30 (m, 1H, benzene H), 7.44 (d, 1H, benzene H), 7.73 (s, 1H, quinolinone C8-H), 8.23 (d, 1H, quinolinone C5-H), 8.74 (s, 1H, quinolinone C2-H).

**3-Acetyl-1-(4-phenylbutyl)quinolin-4(1H)-one (13x).** White solid; 65%; IR  $\nu$  1672 (C=O), 1655 (C=O)  $\text{cm}^{-1}$ ;  $^1\text{H}$  NMR (DMSO- $d_6$ )  $\delta$  1.60 (m, 2H, CH<sub>2</sub>), 1.75 (m, 2H, CH<sub>2</sub>), 2.55-2.60 (m, 5H, CH<sub>3</sub> and CH<sub>2</sub>), 4.41 (t, 2H, CH<sub>2</sub>), 7.12-7.25 (m, 5H, benzene H), 7.48 (m, 1H, quinolinone C6-H), 7.74-7.79 (m, 2H, quinolinone C8-H and C7-H), 8.30 (d, 1H, quinolinone C5-H), 8.63 (s, 1H, quinolinone C2-H).

**3-Acetyl-1-[(naphthalen-2-yl)methyl]quinolin-4(1H)-one (13y).** White solid; 60%; IR  $\nu$  1668 (C=O), 1633 (C=O)  $\text{cm}^{-1}$ ;  $^1\text{H}$  NMR (DMSO- $d_6$ )  $\delta$  2.66 (s, 3H, CH<sub>3</sub>), 5.86 (s, 2H, CH<sub>2</sub>), 7.36-7.48 (m, 4H, naphthalene H), 7.61-7.70 (m, 2H, naphthalene H), 7.74 (s, 1H, naphthalene H), 7.82-7.90 (m, 3H, quinolinone C6-H, C7-H and C8-H), 8.31 (d, 1H, quinolinone C5-H), 8.93 (s, 1H, quinolinone C2-H).

**3-Acetyl-1-[(pyridin-4-yl)methyl]quinolin-4(1H)-one (13z).** Dark solid; 55%; IR  $\nu$  1660 (C=O), 1621 (C=O)  $\text{cm}^{-1}$ ;  $^1\text{H}$  NMR (DMSO- $d_6$ )  $\delta$  2.64 (s, 3H, CH<sub>3</sub>), 5.76 (s, 2H, CH<sub>2</sub>), 7.17 (d, 2H, pyridine H), 7.45 (t, 1H, quinolinone C6-H), 7.51 (d, 1H, quinolinone C8-H), 7.67 (t, 1H, quinolinone C7-H), 8.31 (d, 1H, quinolinone C5-H), 8.49 (d, 2H, pyridine H), 8.86 (s, 1H, quinolinone C2-H).

**3-Acetyl-1-[(quinolin-2-yl)methyl]quinolin-4(1H)-one (13aa).** Brown solid; 52%; IR  $\nu$  1658 (C=O), 1634 (C=O)  $\text{cm}^{-1}$ ;  $^1\text{H}$  NMR (DMSO- $d_6$ )  $\delta$  2.67 (s, 3H, CH<sub>3</sub>), 5.98 (s, 2H, CH<sub>2</sub>), 7.42 (m, 1H, quinoline H), 7.50 (d, 1H, quinoline H), 7.54-7.61 (m, 3H, quinoline H and quinolinone C6-H), 7.69 (t, 1H, quinolinone C7-H), 7.82 (d, 1H, quinoline H), 7.94 (d, 1H, quinolinone C8-H), 8.30 (d, 1H, quinoline H), 8.36 (d, 1H, quinolinone C5-H), 8.94 (s, 1H, quinolinone C2-H).

**2. Table 1.** Chemical, Physical and Analytical Data of Derivatives **13a-c** and **13a-aa**.

| N° | R | R <sub>2</sub> | R <sub>3</sub> | R <sub>4</sub> | R <sub>5</sub> | R <sub>6</sub> | mp (°C) | Recryst solvent <sup>a</sup> | yield (%) |
|----|---|----------------|----------------|----------------|----------------|----------------|---------|------------------------------|-----------|
|    |   |                |                |                |                |                |         |                              |           |

|                        |                                                                                     |                  |                  |                  |                 |    |         |   |     |
|------------------------|-------------------------------------------------------------------------------------|------------------|------------------|------------------|-----------------|----|---------|---|-----|
| <b>12a<sup>b</sup></b> | H                                                                                   | -                | -                | -                | -               | -  | 242     | a | 56  |
| <b>12b</b>             | 7-Cl                                                                                | -                | -                | -                | -               | -  | >300    | h | 95  |
| <b>12c<sup>c</sup></b> | 8-Cl                                                                                | -                | -                | -                | -               | -  |         |   |     |
| <b>13a</b>             | -                                                                                   | H                | H                | H                | H               | H  | 212-213 | b |     |
| <b>13b</b>             | -                                                                                   | F                | H                | H                | H               | H  | 199-201 | c | 79  |
| <b>13c</b>             | -                                                                                   | OCH <sub>3</sub> | H                | H                | H               | H  | 204-206 | e | 88  |
| <b>13d</b>             | -                                                                                   | H                | F                | H                | H               | H  | 247-248 | d | 81  |
| <b>13e</b>             | -                                                                                   | H                | OCH <sub>3</sub> | H                | H               | H  | 175-177 | b | 86  |
| <b>13f</b>             | -                                                                                   | H                | H                | Cl               | H               | H  | 242-244 | d | 82  |
| <b>13g</b>             | -                                                                                   | H                | H                | OH               | H               | H  | 203-205 | i | 96  |
| <b>13h</b>             | -                                                                                   | H                | H                | OCH <sub>3</sub> | H               | H  | 165-166 | b | 88  |
| <b>13i</b>             | -                                                                                   | H                | H                | NO <sub>2</sub>  | H               | H  | 160-161 | d | 80  |
| <b>13j</b>             | -                                                                                   | F                | H                | F                | H               | H  | 234-236 | c | 81  |
| <b>13k</b>             | -                                                                                   | F                | H                | H                | F               | H  | 182-187 | c | 89  |
| <b>13l</b>             | -                                                                                   | F                | H                | H                | H               | F  | 192-193 | e |     |
| <b>13m</b>             | -                                                                                   | H                | F                | F                | H               | H  | 256-260 | f | 93  |
| <b>13n</b>             | -                                                                                   | H                | F                | H                | F               | H  | 250-252 | a | 83  |
| <b>13o</b>             | -                                                                                   | Cl               | H                | Cl               | H               | H  | 270-273 | e | 98  |
| <b>13p</b>             | -                                                                                   | Cl               | H                | H                | H               | Cl | 195-198 | c | 87  |
| <b>13q</b>             | -                                                                                   | CH <sub>3</sub>  | H                | CH <sub>3</sub>  | H               | H  | 210-212 | c | 100 |
| <b>13r</b>             | -                                                                                   | H                | CH <sub>3</sub>  | H                | CH <sub>3</sub> | H  | 232-237 | c | 100 |
| <b>13s</b>             | -                                                                                   | F                | Cl               | H                | H               | H  | 132-133 |   |     |
| <b>13t</b>             | -                                                                                   | H                | Cl               | F                | H               | H  | 132-133 |   |     |
| <b>13u</b>             | 8-Cl                                                                                | H                | Cl               | F                | H               | H  | 197-198 |   |     |
| <b>13v</b>             | 8-Cl                                                                                | F                | H                | H                | H               | H  |         |   |     |
| <b>13w</b>             | 7-Cl                                                                                | F                | H                | H                | H               | H  |         |   |     |
| <b>13x</b>             | 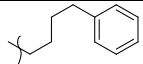 |                  |                  |                  |                 |    | 99-101  | b | 26  |
| <b>13y</b>             |  |                  |                  |                  |                 |    | 226-227 | i | 69  |



|             |                                                                                   |         |   |     |
|-------------|-----------------------------------------------------------------------------------|---------|---|-----|
| <b>13z</b>  | 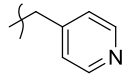 | 254-256 | d | 73  |
| <b>13aa</b> |  | 241-242 | d | 100 |

<sup>a</sup> Recrystallization solvents: (a) acetone, (b) benzene/cyclohexane, (c) toluene, (d) DMF/H<sub>2</sub>O, (e) benzene, (f) chloroform, (g) toluene/cyclohexane, (h) ethanol, (i) methanol. <sup>b</sup> See Mapara, R. K.; Desai, C. Synthesis of 4-hydroxyquinolines. *J. Indian. Chem. Soc.* **1954**, *31*, 951–956. <sup>c</sup> Reference <sup>19b</sup>.

### 3. Analyses

| Compd      | Elemental Analyses Calculated/ Found |      |      |      |      |
|------------|--------------------------------------|------|------|------|------|
|            | C                                    | H    | N    | Cl   | F    |
| <b>10a</b> | 70.02                                | 5.07 | 3.71 |      |      |
|            | 70.29                                | 4.97 | 4.01 |      |      |
| <b>10b</b> | 66.83                                | 4.59 | 3.54 |      | 4.81 |
|            | 66.81                                | 4.87 | 3.50 |      | 4.88 |
| <b>10c</b> | 67.80                                | 5.20 | 3.44 |      |      |
|            | 68.05                                | 5.36 | 3.55 |      |      |
| <b>10d</b> | 66.83                                | 4.59 | 3.54 |      | 4.81 |
|            | 66.80                                | 4.25 | 3.39 |      | 4.69 |
| <b>10e</b> | 67.80                                | 5.20 | 3.44 |      |      |
|            | 67.78                                | 5.21 | 3.41 |      |      |
| <b>10f</b> | 64.16                                | 4.41 | 3.40 | 8.61 |      |
|            | 63.93                                | 4.59 | 3.70 | 8.66 |      |
| <b>10g</b> | 67.17                                | 4.87 | 3.56 |      |      |
|            | 67.21                                | 4.93 | 3.80 |      |      |
| <b>10h</b> | 67.80                                | 5.20 | 3.44 |      |      |
|            | 67.65                                | 5.08 | 3.47 |      |      |

|            |       |      |      |       |      |
|------------|-------|------|------|-------|------|
| <b>10i</b> | 62.56 | 4.30 | 6.63 |       |      |
|            | 62.50 | 4.20 | 6.99 |       |      |
| <b>10j</b> | 63.92 | 4.15 | 3.39 |       | 9.19 |
|            | 63.91 | 4.25 | 3.03 |       | 9.50 |
| <b>10k</b> | 63.92 | 4.15 | 3.39 |       | 9.19 |
|            | 63.83 | 4.34 | 3.31 |       | 9.22 |
| <b>10l</b> | 63.92 | 4.15 | 3.39 |       | 9.19 |
|            | 63.59 | 3.98 | 3.38 |       | 9.30 |
| <b>10m</b> | 63.92 | 4.15 | 3.39 |       | 9.19 |
|            | 63.55 | 4.08 | 3.36 |       | 9.27 |
| <b>10n</b> | 63.92 | 4.15 | 3.39 |       | 9.19 |
|            | 68.69 | 4.13 | 3.18 |       | 9.21 |
| <b>10o</b> | 59.21 | 3.84 | 3.14 | 15.89 |      |
|            | 59.40 | 3.79 | 3.01 | 15.70 |      |
| <b>10p</b> | 59.21 | 3.84 | 3.14 | 15.89 |      |
|            | 59.49 | 3.71 | 3.18 | 15.78 |      |
| <b>10q</b> | 71.10 | 5.72 | 3.45 |       |      |
|            | 71.13 | 5.77 | 3.11 |       |      |
| <b>10r</b> | 71.10 | 5.72 | 3.45 |       |      |
|            | 71.21 | 5.79 | 3.63 |       |      |
| <b>10s</b> | 61.48 | 3.99 | 3.26 | 8.25  | 4.42 |
|            | 61.62 | 4.25 | 3.46 | 8.29  | 4.50 |
| <b>10t</b> | 61.48 | 3.99 | 3.26 | 8.25  | 4.42 |
|            | 61.22 | 3.98 | 3.33 | 8.31  | 4.64 |
| <b>10u</b> | 56.91 | 3.47 | 3.02 | 15.27 | 4.09 |
|            | 56.92 | 3.47 | 2.94 | 15.35 | 3.99 |
| <b>10v</b> | 61.48 | 3.99 | 3.26 | 8.25  | 4.42 |

|             |       |      |      |      |      |
|-------------|-------|------|------|------|------|
|             | 61.28 | 4.04 | 3.22 | 8.20 | 4.55 |
| <b>10w</b>  | 61.48 | 3.99 | 3.26 | 8.25 | 4.42 |
|             | 61.71 | 3.95 | 3.39 | 8.10 | 4.50 |
| <b>10x</b>  | 71.58 | 6.01 | 3.34 |      |      |
|             | 71.59 | 6.08 | 3.05 |      |      |
| <b>10y</b>  | 73.06 | 4.95 | 3.28 |      |      |
|             | 73.13 | 4.91 | 3.34 |      |      |
| <b>10z</b>  | 66.66 | 4.79 | 7.40 |      |      |
|             | 66.89 | 4.78 | 7.60 |      |      |
| <b>10aa</b> | 70.08 | 4.71 | 6.54 |      |      |
|             | 70.19 | 4.56 | 6.75 |      |      |
| <b>11a</b>  | 68.76 | 4.33 | 4.01 |      |      |
|             | 68.40 | 4.38 | 4.06 |      |      |
| <b>11b</b>  | 65.40 | 3.84 | 3.81 |      | 5.17 |
|             | 65.59 | 3.86 | 3.87 |      | 5.11 |
| <b>11c</b>  | 66.49 | 4.52 | 3.69 |      |      |
|             | 66.47 | 4.24 | 3.72 |      |      |
| <b>11d</b>  | 65.40 | 3.84 | 3.81 |      | 5.17 |
|             | 65.50 | 3.83 | 3.70 |      | 5.29 |
| <b>11e</b>  | 66.49 | 4.52 | 3.69 |      |      |
|             | 66.53 | 4.64 | 3.59 |      |      |
| <b>11f</b>  | 62.59 | 3.68 | 3.65 | 9.24 |      |
|             | 62.76 | 3.93 | 3.98 | 9.35 |      |
| <b>11g</b>  | 65.75 | 4.14 | 3.83 |      |      |
|             | 65.85 | 4.12 | 3.81 |      |      |
| <b>11h</b>  | 66.49 | 4.52 | 3.69 |      |      |
|             | 66.46 | 4.30 | 3.68 |      |      |
| <b>11i</b>  | 60.92 | 3.58 | 7.10 |      |      |

|            |       |      |      |       |       |
|------------|-------|------|------|-------|-------|
|            | 60.91 | 3.30 | 7.11 |       |       |
| <b>11j</b> | 62.34 | 3.40 | 3.64 |       | 9.86  |
|            | 62.30 | 3.51 | 3.49 |       | 9.99  |
| <b>11k</b> | 62.34 | 3.40 | 3.64 |       | 9.86  |
|            | 62.40 | 3.57 | 3.51 |       | 10.00 |
| <b>11l</b> | 62.34 | 3.40 | 3.64 |       | 9.86  |
|            | 62.38 | 3.23 | 3.33 |       | 9.72  |
| <b>11m</b> | 62.34 | 3.40 | 3.64 |       | 9.86  |
|            | 62.70 | 3.33 | 3.41 |       | 9.66  |
| <b>11n</b> | 62.34 | 3.40 | 3.64 |       | 9.86  |
|            | 62.10 | 3.40 | 3.71 |       | 9.88  |
| <b>11o</b> | 57.44 | 3.13 | 3.35 | 16.95 |       |
|            | 57.40 | 3.11 | 3.68 | 17.10 |       |
| <b>11p</b> | 57.44 | 3.13 | 3.35 | 16.95 |       |
|            | 57.41 | 3.21 | 3.56 | 16.85 |       |
| <b>11q</b> | 70.02 | 5.07 | 3.71 |       |       |
|            | 69.90 | 5.21 | 3.78 |       |       |
| <b>11r</b> | 70.02 | 5.07 | 3.71 |       |       |
|            | 70.00 | 5.12 | 3.51 |       |       |
| <b>11s</b> | 59.79 | 3.26 | 3.49 | 8.82  | 4.73  |
|            | 59.54 | 2.98 | 3.22 | 8.70  | 4.60  |
| <b>11t</b> | 59.79 | 3.26 | 3.49 | 8.82  | 4.73  |
|            | 60.01 | 3.13 | 3.52 | 8.80  | 4.99  |
| <b>11u</b> | 55.07 | 2.77 | 3.21 | 16.25 | 4.36  |
|            | 55.10 | 2.90 | 3.29 | 16.30 | 4.38  |
| <b>11v</b> | 59.79 | 3.26 | 3.49 | 8.82  | 4.73  |
|            | 59.87 | 3.20 | 3.57 | 8.80  | 4.77  |
| <b>11w</b> | 59.79 | 3.26 | 3.49 | 8.82  | 4.73  |
|            | 59.70 | 3.04 | 3.23 | 8.75  | 4.70  |

|             |       |      |      |
|-------------|-------|------|------|
| <b>11x</b>  | 70.58 | 5.41 | 3.58 |
|             | 70.51 | 5.22 | 3.40 |
| <b>11y</b>  | 72.17 | 4.29 | 3.51 |
|             | 72.18 | 4.18 | 3.50 |
| <b>11z</b>  | 65.14 | 4.03 | 8.00 |
|             | 65.14 | 3.99 | 8.32 |
| <b>11aa</b> | 69.00 | 4.03 | 7.00 |
|             | 69.11 | 4.17 | 7.14 |

## Molecular Modelling

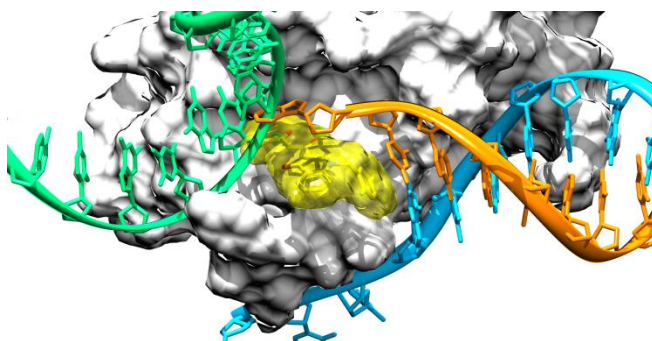

**Figure S1.** Superimposition between our model of the INSTI/HIV-1 IN CCD/viral DNA ternary complex and the pre-catalytic target capture complex (TCC) from PFV (PDB code 3OS1). IN enzymes are represented as light gray surfaces. The host DNA (green) and the non-transferred (cyan) and reactive (orange) viral DNA strands are shown as ribbon and sticks. Compound **11j** is depicted as yellow transparent surface and sticks.

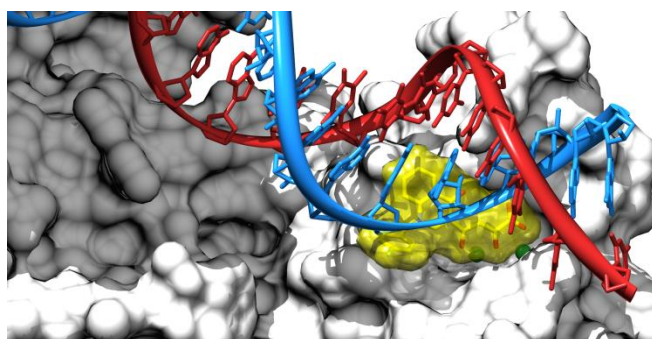

**Figure S2.** Superimposition between our model of the INSTI/RNase H CCD binary complex and the crystal structure of the full-length HIV-1 RT in complex with a synthetic RNA:DNA hybrid (PDB code 1HYS). RNase H enzymes are represented as white surfaces. The DNA (red) and RNA (light blue) strands are shown as ribbon and sticks. Compound **11j** is depicted as yellow transparent surface and sticks.

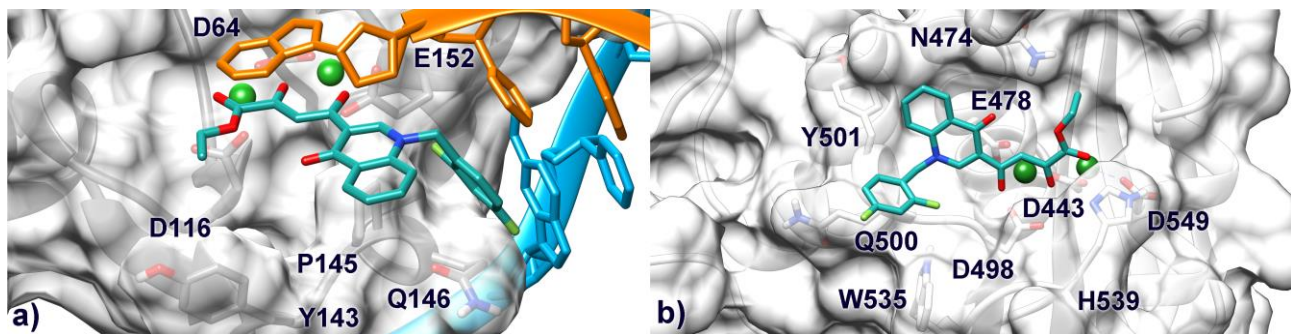

**Figure S3.** a) Binding mode of compound **10j** (cyan) within the HIV-1 IN/DNA model. Catalytic core domain is depicted as transparent light gray surface and ribbons. The non-transferred (blue) and reactive (orange) viral DNA strands are shown as ribbon and sticks. b) Binding mode of compound **10j** (cyan) within the HIV-1 RNase H active site. Catalytic core domain is shown as transparent white surface and ribbons. In both figures, amino acid side chains important for ligand binding are represented as sticks, while  $Mg^{2+}$  metal ions are depicted as green spheres.

## References

<sup>1</sup> Di Santo, R.; Costi, R.; Roux, A.; Miele, G.; Cuzzucoli Crucitti, G.; Iacovo, A.; Rosi, F.; Lavecchia, A.; Marinelli, L.; Di Giovanni, C.; Novellino, E.; Palmisano, L.; Andreotti, M.; Amici, R.; Galluzzo, C. M.; Nencioni, L.; Palamara, A. T.; Pommier, Y.; Marchand, C. Novel quinolinonyl diketo acid derivatives as HIV-1 integrase inhibitors: design, synthesis, and biological activities. *J. Med. Chem.* **2008**, *51*, 4744–4750.
